# Supplementary material for: Vision-based tracking system for augmented reality to localize recurrent laryngeal nerve during robotic thyroid surgery
Source: Springer Nature journal article supplement (doi:10.1038/s41598-020-65439-6), 2020-05-21
Supplement: 41598_2020_65439_MOESM1_ESM.pdf [file 41598_2020_65439_MOESM1_ESM.pdf]

## **Vision-based tracking system for augmented reality to localize recurrent laryngeal nerve during robotic thyroid surgery**

Dongheon Lee <sup>1,†</sup>, Hyeong Won Yu <sup>2,†</sup>, Seunglee Kim <sup>3</sup>, Jin Yoon <sup>2</sup>, Keunchul Lee <sup>2</sup>, Young Jun Chai <sup>4,\*</sup>, June Young Choi <sup>2,\*</sup>, Hyoun-Joong Kong <sup>5</sup>, Kyu Eun Lee <sup>6</sup>, Hwan Seong Cho <sup>7</sup>, and Hee Chan Kim <sup>8</sup>

### **Supplementary Video**

**Video S1.** Application of simultaneous localization and mapping technique for augmented reality image overlay during robotic thyroid surgery.
